# Supplementary material for: Interactome Profile of the Host Cellular Proteins and the Nonstructural Protein 2 of Porcine Reproductive and Respiratory Syndrome Virus
Source: PLoS One. 2014 Jun 5;9(6):e99176. doi: 10.1371/journal.pone.0099176 (PMC4047090; doi:10.1371/journal.pone.0099176)
Supplement: Table S3 — The list of the enriched KEGG Pathways of the PRRSV Nsp2 interacting proteins. (XLS) [file pone.0099176.s003.xls]

## Sheet: 285_pathway_classified
Table S3. The list of the enriched KEGG Pathway of the PRRSV Nsp2 interacting proteins.
	Level one	Level two	Number Of Proteins
1	Genetic Information Processing	Replication and repair	28	red
2	Genetic Information Processing	Translation	55	red
3	Genetic Information Processing	Transcription	17	red
4	Genetic Information Processing	Folding, sorting and degradation	30	red
5	Organismal Systems	Nervous system	37	blue
6	Organismal Systems	Excretory system	8	blue
7	Organismal Systems	Sensory system	1	blue
8	Organismal Systems	Digestive system	18	blue
9	Organismal Systems	Endocrine system	17	blue
10	Organismal Systems	Circulatory system	5	blue
11	Organismal Systems	Immune system	52	blue
12	Organismal Systems	Development	9	blue
13	Cellular Processes	Cell motility	4	sandybrown
14	Cellular Processes	Cell growth and death	21	sandybrown
15	Cellular Processes	Transport and catabolism	19	sandybrown
16	Cellular Processes	Cell communication	22	sandybrown
17	Environmental Information Processing	Signal transduction	48	mediumturquoise
18	Environmental Information Processing	Signaling molecules and interaction	2	mediumturquoise
19	Metabolism	Metabolism of cofactors and vitamins	2	green
20	Metabolism	Amino acid metabolism	4	green
21	Metabolism	Nucleotide metabolism	4	green
22	Metabolism	Glycan biosynthesis and metabolism	3	green
23	Metabolism	Lipid metabolism	5	green
24	Metabolism	Energy metabolism	2	green
25	Metabolism	Carbohydrate metabolism	12	green
26	Metabolism	Biosynthesis of other secondary metabolites	1	green
27	Human Diseases	Endocrine and metabolic diseases	4	hotpink
28	Human Diseases	Immune diseases	8	hotpink
29	Human Diseases	Infectious diseases: Bacterial	41	hotpink
30	Human Diseases	Cancers: Specific types	19	hotpink
31	Human Diseases	Neurodegenerative diseases	28	hotpink
32	Human Diseases	Infectious diseases: Parasitic	18	hotpink
33	Human Diseases	Cardiovascular diseases	8	hotpink
34	Human Diseases	Infectious diseases: Viral	58	hotpink
35	Human Diseases	Substance dependence	15	hotpink

## Sheet: details
Level one	Level two	Level three	Map ID	Number Of Protein	Pathway ID(Ko ID)	KOs	Protein ID	Description
Cellular Processes(4)
-	Cell communication(4)
-	-	Adherens junction	4520	2	ko04520	K07860+K05705+K05704
-	-	-	-	-	-	-	gi|131806|sp|P15153.1|RAC2_HUMAN	-
-	-	-	-	-	-	-	gi|74753102|sp|Q9P0V3.1|SH3B4_HUMAN	-
-	-	Focal adhesion	4510	6	ko04510	K02677+K04438+K07860+K07836+K06269+K05704
-	-	-	-	-	-	-	gi|10719946|sp|O75131.1|CPNE3_HUMAN	-
-	-	-	-	-	-	-	gi|1169094|sp|P46109.1|CRKL_HUMAN	-
-	-	-	-	-	-	-	gi|131806|sp|P15153.1|RAC2_HUMAN	-
-	-	-	-	-	-	-	gi|47117723|sp|P61224.1|RAP1B_HUMAN	-
-	-	-	-	-	-	-	gi|49065811|sp|P62136.1|PP1A_HUMAN	-
-	-	-	-	-	-	-	gi|74753102|sp|Q9P0V3.1|SH3B4_HUMAN	-
-	-	Gap junction	4540	7	ko04540	K02677+K04630+K07374+K02087+K05704
-	-	-	-	-	-	-	gi|10719946|sp|O75131.1|CPNE3_HUMAN	-
-	-	-	-	-	-	-	gi|120996|sp|P08754.3|GNAI3_HUMAN	-
-	-	-	-	-	-	-	gi|121023|sp|P04899.3|GNAI2_HUMAN	-
-	-	-	-	-	-	-	gi|20455322|sp|Q9BQE3.1|TBA1C_HUMAN	-
-	-	-	-	-	-	-	gi|334302921|sp|P06493.3|CDK1_HUMAN	-
-	-	-	-	-	-	-	gi|55977476|sp|P68366.1|TBA4A_HUMAN	-
-	-	-	-	-	-	-	gi|74753102|sp|Q9P0V3.1|SH3B4_HUMAN	-
-	-	Tight junction	4530	7	ko04530	K02677+K06115+K04630+K06106+K05705+K05704
-	-	-	-	-	-	-	gi|10719946|sp|O75131.1|CPNE3_HUMAN	-
-	-	-	-	-	-	-	gi|116242799|sp|Q01082.2|SPTB2_HUMAN	-
-	-	-	-	-	-	-	gi|120996|sp|P08754.3|GNAI3_HUMAN	-
-	-	-	-	-	-	-	gi|121023|sp|P04899.3|GNAI2_HUMAN	-
-	-	-	-	-	-	-	gi|215273892|sp|Q14247.2|SRC8_HUMAN	-
-	-	-	-	-	-	-	gi|3122342|sp|Q14847.2|LASP1_HUMAN	-
-	-	-	-	-	-	-	gi|74753102|sp|Q9P0V3.1|SH3B4_HUMAN	-
-	Cell growth and death(4)
-	-	Apoptosis	4210	3	ko04210	K04727+K04348+K04467
-	-	-	-	-	-	-	gi|13431764|sp|O95831.1|AIFM1_HUMAN	-
-	-	-	-	-	-	-	gi|60659599|sp|P16298.2|PP2BB_HUMAN	-
-	-	-	-	-	-	-	gi|67461558|sp|Q5RCJ9.2|ERLN1_PONAB	-
-	-	Cell cycle	4110	9	ko04110	K06630+K02541+K02209+K06067+K06636+K02087
-	-	-	-	-	-	-	gi|112690|sp|P27348.1|1433T_HUMAN	-
-	-	-	-	-	-	-	gi|19857543|sp|P25205.3|MCM3_HUMAN	-
-	-	-	-	-	-	-	gi|19858646|sp|P33992.5|MCM5_HUMAN	-
-	-	-	-	-	-	-	gi|2498443|sp|Q13547.1|HDAC1_HUMAN	-
-	-	-	-	-	-	-	gi|29336622|sp|Q14683.2|SMC1A_HUMAN	-
-	-	-	-	-	-	-	gi|334302921|sp|P06493.3|CDK1_HUMAN	-
-	-	-	-	-	-	-	gi|48428721|sp|P61981.2|1433G_HUMAN	-
-	-	-	-	-	-	-	gi|51702210|sp|P62258.1|1433E_HUMAN	-
-	-	-	-	-	-	-	gi|68068066|sp|Q92769.2|HDAC2_HUMAN	-
-	-	Oocyte meiosis	4114	7	ko04114	K06630+K06636+K02087+K06269+K04348
-	-	-	-	-	-	-	gi|112690|sp|P27348.1|1433T_HUMAN	-
-	-	-	-	-	-	-	gi|29336622|sp|Q14683.2|SMC1A_HUMAN	-
-	-	-	-	-	-	-	gi|334302921|sp|P06493.3|CDK1_HUMAN	-
-	-	-	-	-	-	-	gi|48428721|sp|P61981.2|1433G_HUMAN	-
-	-	-	-	-	-	-	gi|49065811|sp|P62136.1|PP1A_HUMAN	-
-	-	-	-	-	-	-	gi|51702210|sp|P62258.1|1433E_HUMAN	-
-	-	-	-	-	-	-	gi|60659599|sp|P16298.2|PP2BB_HUMAN	-
-	-	p53 signaling pathway	4115	2	ko04115	K02087+K07207
-	-	-	-	-	-	-	gi|334302921|sp|P06493.3|CDK1_HUMAN	-
-	-	-	-	-	-	-	gi|51315850|sp|Q6GYQ0.1|RGPA1_HUMAN	-
-	Cell motility(1)
-	-	Regulation of actin cytoskeleton	4810	4	ko04810	K04438+K07860+K06269+K05704
-	-	-	-	-	-	-	gi|1169094|sp|P46109.1|CRKL_HUMAN	-
-	-	-	-	-	-	-	gi|131806|sp|P15153.1|RAC2_HUMAN	-
-	-	-	-	-	-	-	gi|49065811|sp|P62136.1|PP1A_HUMAN	-
-	-	-	-	-	-	-	gi|74753102|sp|Q9P0V3.1|SH3B4_HUMAN	-
-	Transport and catabolism(4)
-	-	Endocytosis	4144	13	ko04144	K03283+K01528+K12477+K12483+K12470+K11247+K11826+K05704+K12196
-	-	-	-	-	-	-	gi|123648|sp|P11142.1|HSP7C_HUMAN	-
-	-	-	-	-	-	-	gi|125987821|sp|O00429.2|DNM1L_HUMAN	-
-	-	-	-	-	-	-	gi|147744565|sp|P08107.5|HSP71_HUMAN	-
-	-	-	-	-	-	-	gi|1708307|sp|P54652.1|HSP72_HUMAN	-
-	-	-	-	-	-	-	gi|18202935|sp|Q9H223.1|EHD4_HUMAN	-
-	-	-	-	-	-	-	gi|18202945|sp|Q9H4M9.2|EHD1_HUMAN	-
-	-	-	-	-	-	-	gi|31077034|sp|Q96B97.2|SH3K1_HUMAN	-
-	-	-	-	-	-	-	gi|3122342|sp|Q14847.2|LASP1_HUMAN	-
-	-	-	-	-	-	-	gi|34098614|sp|Q8WXE9.1|STON2_HUMAN	-
-	-	-	-	-	-	-	gi|34978357|sp|P17066.2|HSP76_HUMAN	-
-	-	-	-	-	-	-	gi|50400671|sp|Q9N1U2.1|HSP76_SAGOE	-
-	-	-	-	-	-	-	gi|74753102|sp|Q9P0V3.1|SH3B4_HUMAN	-
-	-	-	-	-	-	-	gi|84028405|sp|Q9NVI7.2|ATD3A_HUMAN	-
-	-	Lysosome	4142	1	ko04142	K12393
-	-	-	-	-	-	-	gi|34098614|sp|Q8WXE9.1|STON2_HUMAN	-
-	-	Peroxisome	4146	1	ko04146	K13279
-	-	-	-	-	-	-	gi|548453|sp|Q06830.1|PRDX1_HUMAN	-
-	-	Phagosome	4145	4	ko04145	K07374+K06856+K08054
-	-	-	-	-	-	-	gi|20455322|sp|Q9BQE3.1|TBA1C_HUMAN	-
-	-	-	-	-	-	-	gi|218512079|sp|P01859.2|IGHG2_HUMAN	-
-	-	-	-	-	-	-	gi|543920|sp|P27824.2|CALX_HUMAN	-
-	-	-	-	-	-	-	gi|55977476|sp|P68366.1|TBA4A_HUMAN	-
Environmental Information Processing(2)
-	Signal transduction(10)
-	-	Calcium signaling pathway	4020	8	ko04020	K02677+K05863+K05853+K05862+K15040+K06856+K04348
-	-	-	-	-	-	-	gi|10719946|sp|O75131.1|CPNE3_HUMAN	-
-	-	-	-	-	-	-	gi|113463|sp|P12236.4|ADT3_HUMAN	-
-	-	-	-	-	-	-	gi|114312|sp|P16615.1|AT2A2_HUMAN	-
-	-	-	-	-	-	-	gi|130683|sp|P21796.2|VDAC1_HUMAN	-
-	-	-	-	-	-	-	gi|158518391|sp|P45880.2|VDAC2_HUMAN	-
-	-	-	-	-	-	-	gi|218512079|sp|P01859.2|IGHG2_HUMAN	-
-	-	-	-	-	-	-	gi|317373597|sp|P05141.7|ADT2_HUMAN	-
-	-	-	-	-	-	-	gi|60659599|sp|P16298.2|PP2BB_HUMAN	-
-	-	ErbB signaling pathway	4012	3	ko04012	K02677+K04438+K05704
-	-	-	-	-	-	-	gi|10719946|sp|O75131.1|CPNE3_HUMAN	-
-	-	-	-	-	-	-	gi|1169094|sp|P46109.1|CRKL_HUMAN	-
-	-	-	-	-	-	-	gi|74753102|sp|Q9P0V3.1|SH3B4_HUMAN	-
-	-	Jak-STAT signaling pathway	4630	1	ko04630	K11219
-	-	-	-	-	-	-	gi|56405328|sp|P29597.3|TYK2_HUMAN	-
-	-	MAPK signaling pathway	4010	12	ko04010	K02677+K04438+K03283+K07860+K04460+K07836+K04348+K04467
-	-	-	-	-	-	-	gi|10719946|sp|O75131.1|CPNE3_HUMAN	-
-	-	-	-	-	-	-	gi|1169094|sp|P46109.1|CRKL_HUMAN	-
-	-	-	-	-	-	-	gi|123648|sp|P11142.1|HSP7C_HUMAN	-
-	-	-	-	-	-	-	gi|131806|sp|P15153.1|RAC2_HUMAN	-
-	-	-	-	-	-	-	gi|147744565|sp|P08107.5|HSP71_HUMAN	-
-	-	-	-	-	-	-	gi|1708307|sp|P54652.1|HSP72_HUMAN	-
-	-	-	-	-	-	-	gi|20455239|sp|Q9UGR2.1|Z3H7B_HUMAN	-
-	-	-	-	-	-	-	gi|34978357|sp|P17066.2|HSP76_HUMAN	-
-	-	-	-	-	-	-	gi|47117723|sp|P61224.1|RAP1B_HUMAN	-
-	-	-	-	-	-	-	gi|50400671|sp|Q9N1U2.1|HSP76_SAGOE	-
-	-	-	-	-	-	-	gi|60659599|sp|P16298.2|PP2BB_HUMAN	-
-	-	-	-	-	-	-	gi|67461558|sp|Q5RCJ9.2|ERLN1_PONAB	-
-	-	NF-kappa B signaling pathway	4064	5	ko04064	K02677+K10798+K07369+K06856+K04467
-	-	-	-	-	-	-	gi|10719946|sp|O75131.1|CPNE3_HUMAN	-
-	-	-	-	-	-	-	gi|130781|sp|P09874.4|PARP1_HUMAN	-
-	-	-	-	-	-	-	gi|20455075|sp|Q9UDY8.1|MALT1_HUMAN	-
-	-	-	-	-	-	-	gi|218512079|sp|P01859.2|IGHG2_HUMAN	-
-	-	-	-	-	-	-	gi|67461558|sp|Q5RCJ9.2|ERLN1_PONAB	-
-	-	Notch signaling pathway	4330	4	ko04330	K06067+K04496
-	-	-	-	-	-	-	gi|2498443|sp|Q13547.1|HDAC1_HUMAN	-
-	-	-	-	-	-	-	gi|3182976|sp|P56545.1|CTBP2_HUMAN	-
-	-	-	-	-	-	-	gi|6014741|sp|Q13363.2|CTBP1_HUMAN	-
-	-	-	-	-	-	-	gi|68068066|sp|Q92769.2|HDAC2_HUMAN	-
-	-	Phosphatidylinositol signaling system	4070	3	ko04070	K02677+K01092+K00923
-	-	-	-	-	-	-	gi|10719946|sp|O75131.1|CPNE3_HUMAN	-
-	-	-	-	-	-	-	gi|3914095|sp|O14732.1|IMPA2_HUMAN	-
-	-	-	-	-	-	-	gi|97049267|sp|Q5RAG2.2|ESYT1_PONAB	-
-	-	VEGF signaling pathway	4370	4	ko04370	K02677+K07860+K04348+K05704
-	-	-	-	-	-	-	gi|10719946|sp|O75131.1|CPNE3_HUMAN	-
-	-	-	-	-	-	-	gi|131806|sp|P15153.1|RAC2_HUMAN	-
-	-	-	-	-	-	-	gi|60659599|sp|P16298.2|PP2BB_HUMAN	-
-	-	-	-	-	-	-	gi|74753102|sp|Q9P0V3.1|SH3B4_HUMAN	-
-	-	Wnt signaling pathway	4310	6	ko04310	K02677+K07860+K04496+K04348+K04512
-	-	-	-	-	-	-	gi|10719946|sp|O75131.1|CPNE3_HUMAN	-
-	-	-	-	-	-	-	gi|131806|sp|P15153.1|RAC2_HUMAN	-
-	-	-	-	-	-	-	gi|3182976|sp|P56545.1|CTBP2_HUMAN	-
-	-	-	-	-	-	-	gi|6014741|sp|Q13363.2|CTBP1_HUMAN	-
-	-	-	-	-	-	-	gi|60659599|sp|P16298.2|PP2BB_HUMAN	-
-	-	-	-	-	-	-	gi|62906888|sp|Q86T65.3|DAAM2_HUMAN	-
-	-	mTOR signaling pathway	4150	2	ko04150	K07207+K02991
-	-	-	-	-	-	-	gi|51315850|sp|Q6GYQ0.1|RGPA1_HUMAN	-
-	-	-	-	-	-	-	gi|51338632|sp|P62753.1|RS6_HUMAN	-
-	Signaling molecules and interaction(1)
-	-	Cell adhesion molecules (CAMs)	4514	2	ko04514	K06491+K06809
-	-	-	-	-	-	-	gi|10719946|sp|O75131.1|CPNE3_HUMAN	-
-	-	-	-	-	-	-	gi|1705553|sp|P55291.1|CAD15_HUMAN	-
Genetic Information Processing(4)
-	Folding, sorting and degradation(5)
-	-	Proteasome	3050	6	ko03050	K02725+K02734+K03033+K03065+K03028+K03064
-	-	-	-	-	-	-	gi|130848|sp|P25786.1|PSA1_HUMAN	-
-	-	-	-	-	-	-	gi|1709762|sp|P49721.1|PSB2_HUMAN	-
-	-	-	-	-	-	-	gi|20532405|sp|O43242.2|PSMD3_HUMAN	-
-	-	-	-	-	-	-	gi|20532406|sp|P17980.3|PRS6A_HUMAN	-
-	-	-	-	-	-	-	gi|6174930|sp|Q13200.3|PSMD2_HUMAN	-
-	-	-	-	-	-	-	gi|84028405|sp|Q9NVI7.2|ATD3A_HUMAN	-
-	-	Protein export	3060	1	ko03060	K03107
-	-	-	-	-	-	-	gi|37154869|sp|Q9UHB9.2|SRP68_HUMAN	-
-	-	Protein processing in endoplasmic reticulum	4141	17	ko04141	K09487+K03283+K12666+K04079+K09517+K12670+K09485+K08054+K13999+K11519+K10839+K12667
-	-	-	-	-	-	-	gi|119360|sp|P14625.1|ENPL_HUMAN	-
-	-	-	-	-	-	-	gi|123648|sp|P11142.1|HSP7C_HUMAN	-
-	-	-	-	-	-	-	gi|132559|sp|P04843.1|RPN1_HUMAN	-
-	-	-	-	-	-	-	gi|147744565|sp|P08107.5|HSP71_HUMAN	-
-	-	-	-	-	-	-	gi|1708307|sp|P54652.1|HSP72_HUMAN	-
-	-	-	-	-	-	-	gi|17865718|sp|P08238.4|HS90B_HUMAN	-
-	-	-	-	-	-	-	gi|18203497|sp|Q9UBS4.1|DJB11_HUMAN	-
-	-	-	-	-	-	-	gi|239938926|sp|P39656.4|OST48_HUMAN	-
-	-	-	-	-	-	-	gi|311033441|sp|O95757.3|HS74L_HUMAN	-
-	-	-	-	-	-	-	gi|34978357|sp|P17066.2|HSP76_HUMAN	-
-	-	-	-	-	-	-	gi|50400671|sp|Q9N1U2.1|HSP76_SAGOE	-
-	-	-	-	-	-	-	gi|543920|sp|P27824.2|CALX_HUMAN	-
-	-	-	-	-	-	-	gi|74735614|sp|Q07065.2|CKAP4_HUMAN	-
-	-	-	-	-	-	-	gi|75041795|sp|Q5R9W3.1|DERL1_PONAB	-
-	-	-	-	-	-	-	gi|75061673|sp|Q5R606.1|HS105_PONAB	-
-	-	-	-	-	-	-	gi|76800648|sp|P46379.2|BAG6_HUMAN	-
-	-	-	-	-	-	-	gi|9297108|sp|P04844.3|RPN2_HUMAN	-
-	-	RNA degradation	3018	5	ko03018	K04077+K03679+K13126+K12619
-	-	-	-	-	-	-	gi|129379|sp|P10809.2|CH60_HUMAN	-
-	-	-	-	-	-	-	gi|13878748|sp|Q13868.2|EXOS2_HUMAN	-
-	-	-	-	-	-	-	gi|3183544|sp|P11940.2|PABP1_HUMAN	-
-	-	-	-	-	-	-	gi|71152402|sp|Q5NVM5.1|CH60_PONAB	-
-	-	-	-	-	-	-	gi|75040978|sp|Q5R4L5.1|XRN2_PONAB	-
-	-	Ubiquitin mediated proteolysis	4120	1	ko04120	K10610
-	-	-	-	-	-	-	gi|418316|sp|P33194.1|DDB1_CHLAE	-
-	Replication and repair(7)
-	-	Base excision repair	3410	3	ko03410	K10798+K10776+K10803
-	-	-	-	-	-	-	gi|130781|sp|P09874.4|PARP1_HUMAN	-
-	-	-	-	-	-	-	gi|251757259|sp|P49916.2|DNLI3_HUMAN	-
-	-	-	-	-	-	-	gi|317373290|sp|P18887.2|XRCC1_HUMAN	-
-	-	DNA replication	3030	6	ko03030	K10739+K07466+K02541+K02209+K10755+K10756
-	-	-	-	-	-	-	gi|132474|sp|P15927.1|RFA2_HUMAN	-
-	-	-	-	-	-	-	gi|1350579|sp|P27694.2|RFA1_HUMAN	-
-	-	-	-	-	-	-	gi|19857543|sp|P25205.3|MCM3_HUMAN	-
-	-	-	-	-	-	-	gi|19858646|sp|P33992.5|MCM5_HUMAN	-
-	-	-	-	-	-	-	gi|2507300|sp|P35250.3|RFC2_HUMAN	-
-	-	-	-	-	-	-	gi|3915601|sp|P40938.2|RFC3_HUMAN	-
-	-	Fanconi anemia pathway	3460	3	ko03460	K10739+K07466+K10901
-	-	-	-	-	-	-	gi|132474|sp|P15927.1|RFA2_HUMAN	-
-	-	-	-	-	-	-	gi|1350579|sp|P27694.2|RFA1_HUMAN	-
-	-	-	-	-	-	-	gi|1705486|sp|P54132.1|BLM_HUMAN	-
-	-	Homologous recombination	3440	4	ko03440	K10739+K07466+K10901+K10869
-	-	-	-	-	-	-	gi|132474|sp|P15927.1|RFA2_HUMAN	-
-	-	-	-	-	-	-	gi|1350579|sp|P27694.2|RFA1_HUMAN	-
-	-	-	-	-	-	-	gi|1705486|sp|P54132.1|BLM_HUMAN	-
-	-	-	-	-	-	-	gi|38258892|sp|O15315.2|RA51B_HUMAN	-
-	-	Mismatch repair	3430	4	ko03430	K10739+K07466+K10755+K10756
-	-	-	-	-	-	-	gi|132474|sp|P15927.1|RFA2_HUMAN	-
-	-	-	-	-	-	-	gi|1350579|sp|P27694.2|RFA1_HUMAN	-
-	-	-	-	-	-	-	gi|2507300|sp|P35250.3|RFC2_HUMAN	-
-	-	-	-	-	-	-	gi|3915601|sp|P40938.2|RFC3_HUMAN	-
-	-	Non-homologous end-joining	3450	2	ko03450	K10884+K10885
-	-	-	-	-	-	-	gi|125729|sp|P12956.2|XRCC6_HUMAN	-
-	-	-	-	-	-	-	gi|125731|sp|P13010.3|XRCC5_HUMAN	-
-	-	Nucleotide excision repair	3420	6	ko03420	K10739+K07466+K10755+K10756+K10610+K10839
-	-	-	-	-	-	-	gi|132474|sp|P15927.1|RFA2_HUMAN	-
-	-	-	-	-	-	-	gi|1350579|sp|P27694.2|RFA1_HUMAN	-
-	-	-	-	-	-	-	gi|2507300|sp|P35250.3|RFC2_HUMAN	-
-	-	-	-	-	-	-	gi|3915601|sp|P40938.2|RFC3_HUMAN	-
-	-	-	-	-	-	-	gi|418316|sp|P33194.1|DDB1_CHLAE	-
-	-	-	-	-	-	-	gi|76800648|sp|P46379.2|BAG6_HUMAN	-
-	Transcription(1)
-	-	Spliceosome	3040	17	ko03040	K03283+K12820+K11091+K11093+K12741+K12852+K12884+K12831+K12837+K12889+K12881+K12897
-	-	-	-	-	-	-	gi|123648|sp|P11142.1|HSP7C_HUMAN	-
-	-	-	-	-	-	-	gi|13124667|sp|O43143.2|DHX15_HUMAN	-
-	-	-	-	-	-	-	gi|134092|sp|P09012.3|SNRPA_HUMAN	-
-	-	-	-	-	-	-	gi|13635663|sp|P08621.2|RU17_HUMAN	-
-	-	-	-	-	-	-	gi|147744565|sp|P08107.5|HSP71_HUMAN	-
-	-	-	-	-	-	-	gi|14916572|sp|Q13283.1|G3BP1_HUMAN	-
-	-	-	-	-	-	-	gi|1708307|sp|P54652.1|HSP72_HUMAN	-
-	-	-	-	-	-	-	gi|18202501|sp|Q15029.1|U5S1_HUMAN	-
-	-	-	-	-	-	-	gi|20455218|sp|O60812.1|HNRCL_HUMAN	-
-	-	-	-	-	-	-	gi|2500575|sp|Q28521.3|ROA1_MACMU	-
-	-	-	-	-	-	-	gi|2500587|sp|Q15427.1|SF3B4_HUMAN	-
-	-	-	-	-	-	-	gi|267188|sp|P26368.4|U2AF2_HUMAN	-
-	-	-	-	-	-	-	gi|34978357|sp|P17066.2|HSP76_HUMAN	-
-	-	-	-	-	-	-	gi|42560548|sp|Q15365.2|PCBP1_HUMAN	-
-	-	-	-	-	-	-	gi|48429165|sp|Q86V81.3|THOC4_HUMAN	-
-	-	-	-	-	-	-	gi|50400671|sp|Q9N1U2.1|HSP76_SAGOE	-
-	-	-	-	-	-	-	gi|51703330|sp|P62995.1|TRA2B_HUMAN	-
-	Translation(5)
-	-	Aminoacyl-tRNA biosynthesis	970	6	ko00970	K01886+K01887+K01870+K14163
-	-	-	-	-	-	-	gi|1351170|sp|P47897.1|SYQ_HUMAN	-
-	-	-	-	-	-	-	gi|20178331|sp|P54136.2|SYRC_HUMAN	-
-	-	-	-	-	-	-	gi|239938717|sp|P41252.2|SYIC_HUMAN	-
-	-	-	-	-	-	-	gi|288558855|sp|P07814.5|SYEP_HUMAN	-
-	-	-	-	-	-	-	gi|75041818|sp|Q5RA20.1|SYRC_PONAB	-
-	-	-	-	-	-	-	gi|75042508|sp|Q5REH3.1|SYRM_PONAB	-
-	-	RNA transport	3013	20	ko03013	K13137+K01164+K14326+K15516+K14320+K14293+K03253+K13129+K03680+K13126+K02516+K12881+K03231+K03254+K14289
-	-	-	-	-	-	-	gi|12643951|sp|Q9Y3F4.1|STRAP_HUMAN	-
-	-	-	-	-	-	-	gi|13124451|sp|Q99575.2|POP1_HUMAN	-
-	-	-	-	-	-	-	gi|17380291|sp|Q92900.2|RENT1_HUMAN	-
-	-	-	-	-	-	-	gi|189047132|sp|P51114.3|FXR1_HUMAN	-
-	-	-	-	-	-	-	gi|20137527|sp|Q9NRG9.1|AAAS_HUMAN	-
-	-	-	-	-	-	-	gi|20981701|sp|Q14974.2|IMB1_HUMAN	-
-	-	-	-	-	-	-	gi|218512094|sp|P55884.3|EIF3B_HUMAN	-
-	-	-	-	-	-	-	gi|2498924|sp|Q16637.1|SMN_HUMAN	-
-	-	-	-	-	-	-	gi|259016171|sp|Q92973.2|TNPO1_HUMAN	-
-	-	-	-	-	-	-	gi|269849732|sp|O14787.3|TNPO2_HUMAN	-
-	-	-	-	-	-	-	gi|28381357|sp|Q9UI10.2|EI2BD_HUMAN	-
-	-	-	-	-	-	-	gi|3183544|sp|P11940.2|PABP1_HUMAN	-
-	-	-	-	-	-	-	gi|32171585|sp|O14744.4|ANM5_HUMAN	-
-	-	-	-	-	-	-	gi|4033763|sp|O00410.4|IPO5_HUMAN	-
-	-	-	-	-	-	-	gi|48429165|sp|Q86V81.3|THOC4_HUMAN	-
-	-	-	-	-	-	-	gi|544328|sp|Q06787.1|FMR1_HUMAN	-
-	-	-	-	-	-	-	gi|55584035|sp|P68104.1|EF1A1_HUMAN	-
-	-	-	-	-	-	-	gi|6685537|sp|Q14152.1|EIF3A_HUMAN	-
-	-	-	-	-	-	-	gi|74734245|sp|Q9HAV4.1|XPO5_HUMAN	-
-	-	-	-	-	-	-	gi|90177782|sp|P51116.2|FXR2_HUMAN	-
-	-	Ribosome	3010	23	ko03010	K02941+K02866+K02981+K02875+K02960+K02873+K02930+K02989+K02940+K02985+K02877+K02984+K02993+K02991+K02885+K02977+K02938+K02936+K02905+K02872+K02882+K02925
-	-	-	-	-	-	-	gi|133041|sp|P05388.1|RLA0_HUMAN	-
-	-	-	-	-	-	-	gi|148887414|sp|P27635.4|RL10_HUMAN	-
-	-	-	-	-	-	-	gi|1710756|sp|P15880.2|RS2_HUMAN	-
-	-	-	-	-	-	-	gi|212276521|sp|P50914.4|RL14_HUMAN	-
-	-	-	-	-	-	-	gi|218511769|sp|P82933.2|RT09_HUMAN	-
-	-	-	-	-	-	-	gi|21903462|sp|P26373.4|RL13_HUMAN	-
-	-	-	-	-	-	-	gi|22002063|sp|P36578.5|RL4_HUMAN	-
-	-	-	-	-	-	-	gi|22002064|sp|P46782.4|RS5_HUMAN	-
-	-	-	-	-	-	-	gi|417677|sp|P32969.1|RL9_HUMAN	-
-	-	-	-	-	-	-	gi|417719|sp|P23396.2|RS3_HUMAN	-
-	-	-	-	-	-	-	gi|47117726|sp|P61313.2|RL15_HUMAN	-
-	-	-	-	-	-	-	gi|47117764|sp|P61247.2|RS3A_HUMAN	-
-	-	-	-	-	-	-	gi|49065831|sp|P62081.1|RS7_HUMAN	-
-	-	-	-	-	-	-	gi|51338632|sp|P62753.1|RS6_HUMAN	-
-	-	-	-	-	-	-	gi|51338661|sp|P84098.1|RL19_HUMAN	-
-	-	-	-	-	-	-	gi|51702000|sp|Q867C2.2|UBIQ_GORGO	-
-	-	-	-	-	-	-	gi|51702823|sp|P62917.2|RL8_HUMAN	-
-	-	-	-	-	-	-	gi|54039239|sp|P62424.2|RL7A_HUMAN	-
-	-	-	-	-	-	-	gi|62511064|sp|Q8HXB8.3|RL29_MACFA	-
-	-	-	-	-	-	-	gi|730451|sp|P40429.2|RL13A_HUMAN	-
-	-	-	-	-	-	-	gi|730538|sp|Q02543.2|RL18A_HUMAN	-
-	-	-	-	-	-	-	gi|730565|sp|P39023.2|RL3_HUMAN	-
-	-	-	-	-	-	-	gi|75077219|sp|Q4R8Z2.3|RL13A_MACFA	-
-	-	Ribosome biogenesis in eukaryotes	3008	2	ko03008	K01164+K12619
-	-	-	-	-	-	-	gi|13124451|sp|Q99575.2|POP1_HUMAN	-
-	-	-	-	-	-	-	gi|75040978|sp|Q5R4L5.1|XRN2_PONAB	-
-	-	mRNA surveillance pathway	3015	4	ko03015	K14326+K13126+K12881+K06269
-	-	-	-	-	-	-	gi|17380291|sp|Q92900.2|RENT1_HUMAN	-
-	-	-	-	-	-	-	gi|3183544|sp|P11940.2|PABP1_HUMAN	-
-	-	-	-	-	-	-	gi|48429165|sp|Q86V81.3|THOC4_HUMAN	-
-	-	-	-	-	-	-	gi|49065811|sp|P62136.1|PP1A_HUMAN	-
Human Diseases(10)
-	Cancers: Overview(2)
-	-	Pathways in cancer	5200	11	ko05200	K02677+K04438+K09487+K07860+K04079+K06067+K04496+K09290+K04467
-	-	-	-	-	-	-	gi|10719946|sp|O75131.1|CPNE3_HUMAN	-
-	-	-	-	-	-	-	gi|1169094|sp|P46109.1|CRKL_HUMAN	-
-	-	-	-	-	-	-	gi|119360|sp|P14625.1|ENPL_HUMAN	-
-	-	-	-	-	-	-	gi|131806|sp|P15153.1|RAC2_HUMAN	-
-	-	-	-	-	-	-	gi|17865718|sp|P08238.4|HS90B_HUMAN	-
-	-	-	-	-	-	-	gi|2498443|sp|Q13547.1|HDAC1_HUMAN	-
-	-	-	-	-	-	-	gi|3182976|sp|P56545.1|CTBP2_HUMAN	-
-	-	-	-	-	-	-	gi|519668659|sp|P06753.2|TPM3_HUMAN	-
-	-	-	-	-	-	-	gi|6014741|sp|Q13363.2|CTBP1_HUMAN	-
-	-	-	-	-	-	-	gi|67461558|sp|Q5RCJ9.2|ERLN1_PONAB	-
-	-	-	-	-	-	-	gi|68068066|sp|Q92769.2|HDAC2_HUMAN	-
-	-	Transcriptional misregulation in cancer	5202	3	ko05202	K06856+K06067
-	-	-	-	-	-	-	gi|218512079|sp|P01859.2|IGHG2_HUMAN	-
-	-	-	-	-	-	-	gi|2498443|sp|Q13547.1|HDAC1_HUMAN	-
-	-	-	-	-	-	-	gi|68068066|sp|Q92769.2|HDAC2_HUMAN	-
-	Cancers: Specific types(10)
-	-	Acute myeloid leukemia	5221	1	ko05221	K04467
-	-	-	-	-	-	-	gi|67461558|sp|Q5RCJ9.2|ERLN1_PONAB	-
-	-	Chronic myeloid leukemia	5220	6	ko05220	K04438+K06067+K04496+K04467
-	-	-	-	-	-	-	gi|1169094|sp|P46109.1|CRKL_HUMAN	-
-	-	-	-	-	-	-	gi|2498443|sp|Q13547.1|HDAC1_HUMAN	-
-	-	-	-	-	-	-	gi|3182976|sp|P56545.1|CTBP2_HUMAN	-
-	-	-	-	-	-	-	gi|6014741|sp|Q13363.2|CTBP1_HUMAN	-
-	-	-	-	-	-	-	gi|67461558|sp|Q5RCJ9.2|ERLN1_PONAB	-
-	-	-	-	-	-	-	gi|68068066|sp|Q92769.2|HDAC2_HUMAN	-
-	-	Colorectal cancer	5210	1	ko05210	K07860
-	-	-	-	-	-	-	gi|131806|sp|P15153.1|RAC2_HUMAN	-
-	-	Glioma	5214	1	ko05214	K02677
-	-	-	-	-	-	-	gi|10719946|sp|O75131.1|CPNE3_HUMAN	-
-	-	Non-small cell lung cancer	5223	1	ko05223	K02677
-	-	-	-	-	-	-	gi|10719946|sp|O75131.1|CPNE3_HUMAN	-
-	-	Pancreatic cancer	5212	2	ko05212	K07860+K04467
-	-	-	-	-	-	-	gi|131806|sp|P15153.1|RAC2_HUMAN	-
-	-	-	-	-	-	-	gi|67461558|sp|Q5RCJ9.2|ERLN1_PONAB	-
-	-	Prostate cancer	5215	3	ko05215	K09487+K04079+K04467
-	-	-	-	-	-	-	gi|119360|sp|P14625.1|ENPL_HUMAN	-
-	-	-	-	-	-	-	gi|17865718|sp|P08238.4|HS90B_HUMAN	-
-	-	-	-	-	-	-	gi|67461558|sp|Q5RCJ9.2|ERLN1_PONAB	-
-	-	Renal cell carcinoma	5211	2	ko05211	K04438+K07836
-	-	-	-	-	-	-	gi|1169094|sp|P46109.1|CRKL_HUMAN	-
-	-	-	-	-	-	-	gi|47117723|sp|P61224.1|RAP1B_HUMAN	-
-	-	Small cell lung cancer	5222	1	ko05222	K04467
-	-	-	-	-	-	-	gi|67461558|sp|Q5RCJ9.2|ERLN1_PONAB	-
-	-	Thyroid cancer	5216	1	ko05216	K09290
-	-	-	-	-	-	-	gi|519668659|sp|P06753.2|TPM3_HUMAN	-
-	Cardiovascular diseases(4)
-	-	Arrhythmogenic right ventricular cardiomyopathy (ARVC)	5412	1	ko05412	K05853
-	-	-	-	-	-	-	gi|114312|sp|P16615.1|AT2A2_HUMAN	-
-	-	Dilated cardiomyopathy	5414	3	ko05414	K05853+K06856+K09290+K10373
-	-	-	-	-	-	-	gi|114312|sp|P16615.1|AT2A2_HUMAN	-
-	-	-	-	-	-	-	gi|218512079|sp|P01859.2|IGHG2_HUMAN	-
-	-	-	-	-	-	-	gi|519668659|sp|P06753.2|TPM3_HUMAN	-
-	-	Hypertrophic cardiomyopathy (HCM)	5410	2	ko05410	K05853+K09290+K10373
-	-	-	-	-	-	-	gi|114312|sp|P16615.1|AT2A2_HUMAN	-
-	-	-	-	-	-	-	gi|519668659|sp|P06753.2|TPM3_HUMAN	-
-	-	Viral myocarditis	5416	2	ko05416	K07860+K06856
-	-	-	-	-	-	-	gi|131806|sp|P15153.1|RAC2_HUMAN	-
-	-	-	-	-	-	-	gi|218512079|sp|P01859.2|IGHG2_HUMAN	-
-	Endocrine and metabolic diseases(2)
-	-	Type I diabetes mellitus	4940	2	ko04940	K04077
-	-	-	-	-	-	-	gi|129379|sp|P10809.2|CH60_HUMAN	-
-	-	-	-	-	-	-	gi|71152402|sp|Q5NVM5.1|CH60_PONAB	-
-	-	Type II diabetes mellitus	4930	2	ko04930	K00844+K00873
-	-	-	-	-	-	-	gi|116242516|sp|P19367.3|HXK1_HUMAN	-
-	-	-	-	-	-	-	gi|20178296|sp|P14618.4|KPYM_HUMAN	-
-	Immune diseases(6)
-	-	Allograft rejection	5330	1	ko05330	K06856
-	-	-	-	-	-	-	gi|218512079|sp|P01859.2|IGHG2_HUMAN	-
-	-	Asthma	5310	1	ko05310	K06856
-	-	-	-	-	-	-	gi|218512079|sp|P01859.2|IGHG2_HUMAN	-
-	-	Autoimmune thyroid disease	5320	1	ko05320	K06856
-	-	-	-	-	-	-	gi|218512079|sp|P01859.2|IGHG2_HUMAN	-
-	-	Primary immunodeficiency	5340	1	ko05340	K06856
-	-	-	-	-	-	-	gi|218512079|sp|P01859.2|IGHG2_HUMAN	-
-	-	Rheumatoid arthritis	5323	1	ko05323	K06856
-	-	-	-	-	-	-	gi|218512079|sp|P01859.2|IGHG2_HUMAN	-
-	-	Systemic lupus erythematosus	5322	3	ko05322	K11090+K06856
-	-	-	-	-	-	-	gi|125985|sp|P05455.2|LA_HUMAN	-
-	-	-	-	-	-	-	gi|218512079|sp|P01859.2|IGHG2_HUMAN	-
-	-	-	-	-	-	-	gi|73621135|sp|Q6PKG0.2|LARP1_HUMAN	-
-	Infectious diseases: Bacterial(9)
-	-	Bacterial invasion of epithelial cells	5100	6	ko05100	K04438+K01528+K06106+K13738+K05704
-	-	-	-	-	-	-	gi|1169094|sp|P46109.1|CRKL_HUMAN	-
-	-	-	-	-	-	-	gi|125987821|sp|O00429.2|DNM1L_HUMAN	-
-	-	-	-	-	-	-	gi|215273892|sp|Q14247.2|SRC8_HUMAN	-
-	-	-	-	-	-	-	gi|30172980|sp|Q9Y5K6.1|CD2AP_HUMAN	-
-	-	-	-	-	-	-	gi|3122342|sp|Q14847.2|LASP1_HUMAN	-
-	-	-	-	-	-	-	gi|74753102|sp|Q9P0V3.1|SH3B4_HUMAN	-
-	-	Epithelial cell signaling in Helicobacter pylori infection	5120	2	ko05120	K04467+K05704
-	-	-	-	-	-	-	gi|67461558|sp|Q5RCJ9.2|ERLN1_PONAB	-
-	-	-	-	-	-	-	gi|74753102|sp|Q9P0V3.1|SH3B4_HUMAN	-
-	-	Legionellosis	5134	9	ko05134	K03233+K03283+K04077+K03231
-	-	-	-	-	-	-	gi|119165|sp|P26641.3|EF1G_HUMAN	-
-	-	-	-	-	-	-	gi|123648|sp|P11142.1|HSP7C_HUMAN	-
-	-	-	-	-	-	-	gi|129379|sp|P10809.2|CH60_HUMAN	-
-	-	-	-	-	-	-	gi|147744565|sp|P08107.5|HSP71_HUMAN	-
-	-	-	-	-	-	-	gi|1708307|sp|P54652.1|HSP72_HUMAN	-
-	-	-	-	-	-	-	gi|34978357|sp|P17066.2|HSP76_HUMAN	-
-	-	-	-	-	-	-	gi|50400671|sp|Q9N1U2.1|HSP76_SAGOE	-
-	-	-	-	-	-	-	gi|55584035|sp|P68104.1|EF1A1_HUMAN	-
-	-	-	-	-	-	-	gi|71152402|sp|Q5NVM5.1|CH60_PONAB	-
-	-	Pathogenic Escherichia coli infection	5130	9	ko05130	K02677+K06630+K07374+K06106+K11294
-	-	-	-	-	-	-	gi|10719946|sp|O75131.1|CPNE3_HUMAN	-
-	-	-	-	-	-	-	gi|112690|sp|P27348.1|1433T_HUMAN	-
-	-	-	-	-	-	-	gi|20455322|sp|Q9BQE3.1|TBA1C_HUMAN	-
-	-	-	-	-	-	-	gi|215273892|sp|Q14247.2|SRC8_HUMAN	-
-	-	-	-	-	-	-	gi|3122342|sp|Q14847.2|LASP1_HUMAN	-
-	-	-	-	-	-	-	gi|48428721|sp|P61981.2|1433G_HUMAN	-
-	-	-	-	-	-	-	gi|51702210|sp|P62258.1|1433E_HUMAN	-
-	-	-	-	-	-	-	gi|55977476|sp|P68366.1|TBA4A_HUMAN	-
-	-	-	-	-	-	-	gi|90110781|sp|P19338.3|NUCL_HUMAN	-
-	-	Pertussis	5133	2	ko05133	K04630
-	-	-	-	-	-	-	gi|120996|sp|P08754.3|GNAI3_HUMAN	-
-	-	-	-	-	-	-	gi|121023|sp|P04899.3|GNAI2_HUMAN	-
-	-	Shigellosis	5131	5	ko05131	K04438+K06106+K04467+K05704
-	-	-	-	-	-	-	gi|1169094|sp|P46109.1|CRKL_HUMAN	-
-	-	-	-	-	-	-	gi|215273892|sp|Q14247.2|SRC8_HUMAN	-
-	-	-	-	-	-	-	gi|3122342|sp|Q14847.2|LASP1_HUMAN	-
-	-	-	-	-	-	-	gi|67461558|sp|Q5RCJ9.2|ERLN1_PONAB	-
-	-	-	-	-	-	-	gi|74753102|sp|Q9P0V3.1|SH3B4_HUMAN	-
-	-	Staphylococcus aureus infection	5150	1	ko05150	K06856
-	-	-	-	-	-	-	gi|218512079|sp|P01859.2|IGHG2_HUMAN	-
-	-	Tuberculosis	5152	6	ko05152	K04077+K07369+K06856+K04348+K05704
-	-	-	-	-	-	-	gi|129379|sp|P10809.2|CH60_HUMAN	-
-	-	-	-	-	-	-	gi|20455075|sp|Q9UDY8.1|MALT1_HUMAN	-
-	-	-	-	-	-	-	gi|218512079|sp|P01859.2|IGHG2_HUMAN	-
-	-	-	-	-	-	-	gi|60659599|sp|P16298.2|PP2BB_HUMAN	-
-	-	-	-	-	-	-	gi|71152402|sp|Q5NVM5.1|CH60_PONAB	-
-	-	-	-	-	-	-	gi|74753102|sp|Q9P0V3.1|SH3B4_HUMAN	-
-	-	Vibrio cholerae infection	5110	1	ko05110	K02677
-	-	-	-	-	-	-	gi|10719946|sp|O75131.1|CPNE3_HUMAN	-
-	Infectious diseases: Parasitic(5)
-	-	African trypanosomiasis	5143	2	ko05143	K02677+K06856
-	-	-	-	-	-	-	gi|10719946|sp|O75131.1|CPNE3_HUMAN	-
-	-	-	-	-	-	-	gi|218512079|sp|P01859.2|IGHG2_HUMAN	-
-	-	Amoebiasis	5146	2	ko05146	K02677+K06856
-	-	-	-	-	-	-	gi|10719946|sp|O75131.1|CPNE3_HUMAN	-
-	-	-	-	-	-	-	gi|218512079|sp|P01859.2|IGHG2_HUMAN	-
-	-	Chagas disease (American trypanosomiasis)	5142	3	ko05142	K04630+K04467
-	-	-	-	-	-	-	gi|120996|sp|P08754.3|GNAI3_HUMAN	-
-	-	-	-	-	-	-	gi|121023|sp|P04899.3|GNAI2_HUMAN	-
-	-	-	-	-	-	-	gi|67461558|sp|Q5RCJ9.2|ERLN1_PONAB	-
-	-	Leishmaniasis	5140	2	ko05140	K02677+K06856
-	-	-	-	-	-	-	gi|10719946|sp|O75131.1|CPNE3_HUMAN	-
-	-	-	-	-	-	-	gi|218512079|sp|P01859.2|IGHG2_HUMAN	-
-	-	Toxoplasmosis	5145	9	ko05145	K04630+K03283+K11219+K04467
-	-	-	-	-	-	-	gi|120996|sp|P08754.3|GNAI3_HUMAN	-
-	-	-	-	-	-	-	gi|121023|sp|P04899.3|GNAI2_HUMAN	-
-	-	-	-	-	-	-	gi|123648|sp|P11142.1|HSP7C_HUMAN	-
-	-	-	-	-	-	-	gi|147744565|sp|P08107.5|HSP71_HUMAN	-
-	-	-	-	-	-	-	gi|1708307|sp|P54652.1|HSP72_HUMAN	-
-	-	-	-	-	-	-	gi|34978357|sp|P17066.2|HSP76_HUMAN	-
-	-	-	-	-	-	-	gi|50400671|sp|Q9N1U2.1|HSP76_SAGOE	-
-	-	-	-	-	-	-	gi|56405328|sp|P29597.3|TYK2_HUMAN	-
-	-	-	-	-	-	-	gi|67461558|sp|Q5RCJ9.2|ERLN1_PONAB	-
-	Infectious diseases: Viral(6)
-	-	Epstein-Barr virus infection	5169	21	ko05169	K06630+K03283+K03033+K03065+K11838+K06856+K06067+K15978+K02087+K11219+K03028+K04467+K03064
-	-	-	-	-	-	-	gi|112690|sp|P27348.1|1433T_HUMAN	-
-	-	-	-	-	-	-	gi|123648|sp|P11142.1|HSP7C_HUMAN	-
-	-	-	-	-	-	-	gi|147744565|sp|P08107.5|HSP71_HUMAN	-
-	-	-	-	-	-	-	gi|1708307|sp|P54652.1|HSP72_HUMAN	-
-	-	-	-	-	-	-	gi|20532405|sp|O43242.2|PSMD3_HUMAN	-
-	-	-	-	-	-	-	gi|20532406|sp|P17980.3|PRS6A_HUMAN	-
-	-	-	-	-	-	-	gi|212276477|sp|Q93009.2|UBP7_HUMAN	-
-	-	-	-	-	-	-	gi|218512079|sp|P01859.2|IGHG2_HUMAN	-
-	-	-	-	-	-	-	gi|2498443|sp|Q13547.1|HDAC1_HUMAN	-
-	-	-	-	-	-	-	gi|296439446|sp|Q9ULX6.3|AKP8L_HUMAN	-
-	-	-	-	-	-	-	gi|334302921|sp|P06493.3|CDK1_HUMAN	-
-	-	-	-	-	-	-	gi|34978357|sp|P17066.2|HSP76_HUMAN	-
-	-	-	-	-	-	-	gi|48428721|sp|P61981.2|1433G_HUMAN	-
-	-	-	-	-	-	-	gi|50400671|sp|Q9N1U2.1|HSP76_SAGOE	-
-	-	-	-	-	-	-	gi|51702210|sp|P62258.1|1433E_HUMAN	-
-	-	-	-	-	-	-	gi|56405328|sp|P29597.3|TYK2_HUMAN	-
-	-	-	-	-	-	-	gi|5902752|sp|O43823.1|AKAP8_HUMAN	-
-	-	-	-	-	-	-	gi|6174930|sp|Q13200.3|PSMD2_HUMAN	-
-	-	-	-	-	-	-	gi|67461558|sp|Q5RCJ9.2|ERLN1_PONAB	-
-	-	-	-	-	-	-	gi|68068066|sp|Q92769.2|HDAC2_HUMAN	-
-	-	-	-	-	-	-	gi|84028405|sp|Q9NVI7.2|ATD3A_HUMAN	-
-	-	HTLV-I infection	5166	7	ko05166	K05863+K05862+K15040+K08054+K04348+K04467
-	-	-	-	-	-	-	gi|113463|sp|P12236.4|ADT3_HUMAN	-
-	-	-	-	-	-	-	gi|130683|sp|P21796.2|VDAC1_HUMAN	-
-	-	-	-	-	-	-	gi|158518391|sp|P45880.2|VDAC2_HUMAN	-
-	-	-	-	-	-	-	gi|317373597|sp|P05141.7|ADT2_HUMAN	-
-	-	-	-	-	-	-	gi|543920|sp|P27824.2|CALX_HUMAN	-
-	-	-	-	-	-	-	gi|60659599|sp|P16298.2|PP2BB_HUMAN	-
-	-	-	-	-	-	-	gi|67461558|sp|Q5RCJ9.2|ERLN1_PONAB	-
-	-	Hepatitis C	5160	2	ko05160	K11219+K04467
-	-	-	-	-	-	-	gi|56405328|sp|P29597.3|TYK2_HUMAN	-
-	-	-	-	-	-	-	gi|67461558|sp|Q5RCJ9.2|ERLN1_PONAB	-
-	-	Herpes simplex infection	5168	8	ko05168	K15414+K15410+K11838+K02087+K12881+K06269+K11219+K04467
-	-	-	-	-	-	-	gi|110832803|sp|Q9MZE0.2|C1QBP_CHLAE	-
-	-	-	-	-	-	-	gi|20141357|sp|P29692.5|EF1D_HUMAN	-
-	-	-	-	-	-	-	gi|212276477|sp|Q93009.2|UBP7_HUMAN	-
-	-	-	-	-	-	-	gi|334302921|sp|P06493.3|CDK1_HUMAN	-
-	-	-	-	-	-	-	gi|48429165|sp|Q86V81.3|THOC4_HUMAN	-
-	-	-	-	-	-	-	gi|49065811|sp|P62136.1|PP1A_HUMAN	-
-	-	-	-	-	-	-	gi|56405328|sp|P29597.3|TYK2_HUMAN	-
-	-	-	-	-	-	-	gi|67461558|sp|Q5RCJ9.2|ERLN1_PONAB	-
-	-	Influenza A	5164	11	ko05164	K02677+K05863+K03283+K05862+K11219+K15047
-	-	-	-	-	-	-	gi|10719946|sp|O75131.1|CPNE3_HUMAN	-
-	-	-	-	-	-	-	gi|113463|sp|P12236.4|ADT3_HUMAN	-
-	-	-	-	-	-	-	gi|123648|sp|P11142.1|HSP7C_HUMAN	-
-	-	-	-	-	-	-	gi|130683|sp|P21796.2|VDAC1_HUMAN	-
-	-	-	-	-	-	-	gi|147744565|sp|P08107.5|HSP71_HUMAN	-
-	-	-	-	-	-	-	gi|1708307|sp|P54652.1|HSP72_HUMAN	-
-	-	-	-	-	-	-	gi|317373597|sp|P05141.7|ADT2_HUMAN	-
-	-	-	-	-	-	-	gi|34978357|sp|P17066.2|HSP76_HUMAN	-
-	-	-	-	-	-	-	gi|50400671|sp|Q9N1U2.1|HSP76_SAGOE	-
-	-	-	-	-	-	-	gi|56405328|sp|P29597.3|TYK2_HUMAN	-
-	-	-	-	-	-	-	gi|90101344|sp|Q9BUJ2.2|HNRL1_HUMAN	-
-	-	Measles	5162	9	ko05162	K03283+K06856+K14753+K11219+K04467
-	-	-	-	-	-	-	gi|123648|sp|P11142.1|HSP7C_HUMAN	-
-	-	-	-	-	-	-	gi|147744565|sp|P08107.5|HSP71_HUMAN	-
-	-	-	-	-	-	-	gi|1708307|sp|P54652.1|HSP72_HUMAN	-
-	-	-	-	-	-	-	gi|218512079|sp|P01859.2|IGHG2_HUMAN	-
-	-	-	-	-	-	-	gi|34978357|sp|P17066.2|HSP76_HUMAN	-
-	-	-	-	-	-	-	gi|50400671|sp|Q9N1U2.1|HSP76_SAGOE	-
-	-	-	-	-	-	-	gi|54037168|sp|P63244.3|GBLP_HUMAN	-
-	-	-	-	-	-	-	gi|56405328|sp|P29597.3|TYK2_HUMAN	-
-	-	-	-	-	-	-	gi|67461558|sp|Q5RCJ9.2|ERLN1_PONAB	-
-	Neurodegenerative diseases(5)
-	-	Alzheimer's disease	5010	5	ko05010	K05853+K00134+K02136+K04348
-	-	-	-	-	-	-	gi|114312|sp|P16615.1|AT2A2_HUMAN	-
-	-	-	-	-	-	-	gi|120649|sp|P04406.3|G3P_HUMAN	-
-	-	-	-	-	-	-	gi|543875|sp|P36542.1|ATPG_HUMAN	-
-	-	-	-	-	-	-	gi|60659599|sp|P16298.2|PP2BB_HUMAN	-
-	-	-	-	-	-	-	gi|68565024|sp|Q5RBS9.1|ATPG_PONAB	-
-	-	Amyotrophic lateral sclerosis (ALS)	5014	2	ko05014	K04348+K11519
-	-	-	-	-	-	-	gi|60659599|sp|P16298.2|PP2BB_HUMAN	-
-	-	-	-	-	-	-	gi|75041795|sp|Q5R9W3.1|DERL1_PONAB	-
-	-	Huntington's disease	5016	9	ko05016	K05863+K05862+K15040+K06067+K11826+K02136
-	-	-	-	-	-	-	gi|113463|sp|P12236.4|ADT3_HUMAN	-
-	-	-	-	-	-	-	gi|130683|sp|P21796.2|VDAC1_HUMAN	-
-	-	-	-	-	-	-	gi|158518391|sp|P45880.2|VDAC2_HUMAN	-
-	-	-	-	-	-	-	gi|2498443|sp|Q13547.1|HDAC1_HUMAN	-
-	-	-	-	-	-	-	gi|317373597|sp|P05141.7|ADT2_HUMAN	-
-	-	-	-	-	-	-	gi|34098614|sp|Q8WXE9.1|STON2_HUMAN	-
-	-	-	-	-	-	-	gi|543875|sp|P36542.1|ATPG_HUMAN	-
-	-	-	-	-	-	-	gi|68068066|sp|Q92769.2|HDAC2_HUMAN	-
-	-	-	-	-	-	-	gi|68565024|sp|Q5RBS9.1|ATPG_PONAB	-
-	-	Parkinson's disease	5012	6	ko05012	K05863+K05862+K15040+K02136
-	-	-	-	-	-	-	gi|113463|sp|P12236.4|ADT3_HUMAN	-
-	-	-	-	-	-	-	gi|130683|sp|P21796.2|VDAC1_HUMAN	-
-	-	-	-	-	-	-	gi|158518391|sp|P45880.2|VDAC2_HUMAN	-
-	-	-	-	-	-	-	gi|317373597|sp|P05141.7|ADT2_HUMAN	-
-	-	-	-	-	-	-	gi|543875|sp|P36542.1|ATPG_HUMAN	-
-	-	-	-	-	-	-	gi|68565024|sp|Q5RBS9.1|ATPG_PONAB	-
-	-	Prion diseases	5020	6	ko05020	K06491+K03283
-	-	-	-	-	-	-	gi|10719946|sp|O75131.1|CPNE3_HUMAN	-
-	-	-	-	-	-	-	gi|123648|sp|P11142.1|HSP7C_HUMAN	-
-	-	-	-	-	-	-	gi|147744565|sp|P08107.5|HSP71_HUMAN	-
-	-	-	-	-	-	-	gi|1708307|sp|P54652.1|HSP72_HUMAN	-
-	-	-	-	-	-	-	gi|34978357|sp|P17066.2|HSP76_HUMAN	-
-	-	-	-	-	-	-	gi|50400671|sp|Q9N1U2.1|HSP76_SAGOE	-
-	Substance dependence(4)
-	-	Alcoholism	5034	5	ko05034	K04630+K06067+K06269
-	-	-	-	-	-	-	gi|120996|sp|P08754.3|GNAI3_HUMAN	-
-	-	-	-	-	-	-	gi|121023|sp|P04899.3|GNAI2_HUMAN	-
-	-	-	-	-	-	-	gi|2498443|sp|Q13547.1|HDAC1_HUMAN	-
-	-	-	-	-	-	-	gi|49065811|sp|P62136.1|PP1A_HUMAN	-
-	-	-	-	-	-	-	gi|68068066|sp|Q92769.2|HDAC2_HUMAN	-
-	-	Amphetamine addiction	5031	5	ko05031	K02677+K06067+K06269+K04348
-	-	-	-	-	-	-	gi|10719946|sp|O75131.1|CPNE3_HUMAN	-
-	-	-	-	-	-	-	gi|2498443|sp|Q13547.1|HDAC1_HUMAN	-
-	-	-	-	-	-	-	gi|49065811|sp|P62136.1|PP1A_HUMAN	-
-	-	-	-	-	-	-	gi|60659599|sp|P16298.2|PP2BB_HUMAN	-
-	-	-	-	-	-	-	gi|68068066|sp|Q92769.2|HDAC2_HUMAN	-
-	-	Cocaine addiction	5030	2	ko05030	K04630
-	-	-	-	-	-	-	gi|120996|sp|P08754.3|GNAI3_HUMAN	-
-	-	-	-	-	-	-	gi|121023|sp|P04899.3|GNAI2_HUMAN	-
-	-	Morphine addiction	5032	3	ko05032	K02677+K04630
-	-	-	-	-	-	-	gi|10719946|sp|O75131.1|CPNE3_HUMAN	-
-	-	-	-	-	-	-	gi|120996|sp|P08754.3|GNAI3_HUMAN	-
-	-	-	-	-	-	-	gi|121023|sp|P04899.3|GNAI2_HUMAN	-
Metabolism(9)
-	Amino acid metabolism(3)
-	-	Alanine, aspartate and glutamate metabolism	250	1	ko00250	K00820
-	-	-	-	-	-	-	gi|30923274|sp|Q06210.3|GFPT1_HUMAN	-
-	-	Arginine and proline metabolism	330	1	ko00330	K00472
-	-	-	-	-	-	-	gi|2507090|sp|P13674.2|P4HA1_HUMAN	-
-	-	Lysine degradation	310	2	ko00310	K11420+K13645
-	-	-	-	-	-	-	gi|46395885|sp|Q8IUH5.2|ZDH17_HUMAN	-
-	-	-	-	-	-	-	gi|62906878|sp|O00469.2|PLOD2_HUMAN	-
-	Biosynthesis of other secondary metabolites(1)
-	-	Butirosin and neomycin biosynthesis	524	1	ko00524	K00844
-	-	-	-	-	-	-	gi|116242516|sp|P19367.3|HXK1_HUMAN	-
-	Carbohydrate metabolism(8)
-	-	Amino sugar and nucleotide sugar metabolism	520	2	ko00520	K00844+K00820
-	-	-	-	-	-	-	gi|116242516|sp|P19367.3|HXK1_HUMAN	-
-	-	-	-	-	-	-	gi|30923274|sp|Q06210.3|GFPT1_HUMAN	-
-	-	Fructose and mannose metabolism	51	1	ko00051	K00844
-	-	-	-	-	-	-	gi|116242516|sp|P19367.3|HXK1_HUMAN	-
-	-	Galactose metabolism	52	1	ko00052	K00844
-	-	-	-	-	-	-	gi|116242516|sp|P19367.3|HXK1_HUMAN	-
-	-	Glycolysis / Gluconeogenesis	10	3	ko00010	K00844+K00134+K00873
-	-	-	-	-	-	-	gi|116242516|sp|P19367.3|HXK1_HUMAN	-
-	-	-	-	-	-	-	gi|120649|sp|P04406.3|G3P_HUMAN	-
-	-	-	-	-	-	-	gi|20178296|sp|P14618.4|KPYM_HUMAN	-
-	-	Inositol phosphate metabolism	562	2	ko00562	K01092+K00923
-	-	-	-	-	-	-	gi|3914095|sp|O14732.1|IMPA2_HUMAN	-
-	-	-	-	-	-	-	gi|97049267|sp|Q5RAG2.2|ESYT1_PONAB	-
-	-	Pentose phosphate pathway	30	1	ko00030	K00948
-	-	-	-	-	-	-	gi|24418495|sp|Q14558.2|KPRA_HUMAN	-
-	-	Pyruvate metabolism	620	1	ko00620	K00873
-	-	-	-	-	-	-	gi|20178296|sp|P14618.4|KPYM_HUMAN	-
-	-	Starch and sucrose metabolism	500	1	ko00500	K00844
-	-	-	-	-	-	-	gi|116242516|sp|P19367.3|HXK1_HUMAN	-
-	Energy metabolism(1)
-	-	Oxidative phosphorylation	190	2	ko00190	K02136
-	-	-	-	-	-	-	gi|543875|sp|P36542.1|ATPG_HUMAN	-
-	-	-	-	-	-	-	gi|68565024|sp|Q5RBS9.1|ATPG_PONAB	-
-	Global and overview maps(1)
-	-	Metabolic pathways	1100	21	ko01100	K13499+K00844+K00134+K11787+K12666+K01886+K00873+K01937+K12670+K00948+K00472+K14163+K00820+K01092+K02136+K00654+K00044+K00222+K12667+K00923
-	-	-	-	-	-	-	gi|116241296|sp|Q86X52.3|CHSS1_HUMAN	-
-	-	-	-	-	-	-	gi|116242516|sp|P19367.3|HXK1_HUMAN	-
-	-	-	-	-	-	-	gi|120649|sp|P04406.3|G3P_HUMAN	-
-	-	-	-	-	-	-	gi|131616|sp|P22102.1|PUR2_HUMAN	-
-	-	-	-	-	-	-	gi|132559|sp|P04843.1|RPN1_HUMAN	-
-	-	-	-	-	-	-	gi|1351170|sp|P47897.1|SYQ_HUMAN	-
-	-	-	-	-	-	-	gi|20178296|sp|P14618.4|KPYM_HUMAN	-
-	-	-	-	-	-	-	gi|20981706|sp|P17812.2|PYRG1_HUMAN	-
-	-	-	-	-	-	-	gi|239938926|sp|P39656.4|OST48_HUMAN	-
-	-	-	-	-	-	-	gi|24418495|sp|Q14558.2|KPRA_HUMAN	-
-	-	-	-	-	-	-	gi|2507090|sp|P13674.2|P4HA1_HUMAN	-
-	-	-	-	-	-	-	gi|288558855|sp|P07814.5|SYEP_HUMAN	-
-	-	-	-	-	-	-	gi|30923274|sp|Q06210.3|GFPT1_HUMAN	-
-	-	-	-	-	-	-	gi|3914095|sp|O14732.1|IMPA2_HUMAN	-
-	-	-	-	-	-	-	gi|543875|sp|P36542.1|ATPG_HUMAN	-
-	-	-	-	-	-	-	gi|6685580|sp|O15270.1|SPTC2_HUMAN	-
-	-	-	-	-	-	-	gi|68565024|sp|Q5RBS9.1|ATPG_PONAB	-
-	-	-	-	-	-	-	gi|75076029|sp|Q4R5G7.1|DHB12_MACFA	-
-	-	-	-	-	-	-	gi|92090595|sp|O76062.3|ERG24_HUMAN	-
-	-	-	-	-	-	-	gi|9297108|sp|P04844.3|RPN2_HUMAN	-
-	-	-	-	-	-	-	gi|97049267|sp|Q5RAG2.2|ESYT1_PONAB	-
-	Glycan biosynthesis and metabolism(1)
-	-	N-Glycan biosynthesis	510	3	ko00510	K12666+K12670+K12667
-	-	-	-	-	-	-	gi|132559|sp|P04843.1|RPN1_HUMAN	-
-	-	-	-	-	-	-	gi|239938926|sp|P39656.4|OST48_HUMAN	-
-	-	-	-	-	-	-	gi|9297108|sp|P04844.3|RPN2_HUMAN	-
-	Lipid metabolism(5)
-	-	Biosynthesis of unsaturated fatty acids	1040	1	ko01040	K00044
-	-	-	-	-	-	-	gi|75076029|sp|Q4R5G7.1|DHB12_MACFA	-
-	-	Fatty acid elongation	62	1	ko00062	K00044
-	-	-	-	-	-	-	gi|75076029|sp|Q4R5G7.1|DHB12_MACFA	-
-	-	Sphingolipid metabolism	600	1	ko00600	K00654
-	-	-	-	-	-	-	gi|6685580|sp|O15270.1|SPTC2_HUMAN	-
-	-	Steroid biosynthesis	100	1	ko00100	K00222
-	-	-	-	-	-	-	gi|92090595|sp|O76062.3|ERG24_HUMAN	-
-	-	Steroid hormone biosynthesis	140	1	ko00140	K00044
-	-	-	-	-	-	-	gi|75076029|sp|Q4R5G7.1|DHB12_MACFA	-
-	Metabolism of cofactors and vitamins(2)
-	-	One carbon pool by folate	670	1	ko00670	K11787
-	-	-	-	-	-	-	gi|131616|sp|P22102.1|PUR2_HUMAN	-
-	-	Porphyrin and chlorophyll metabolism	860	1	ko00860	K14163
-	-	-	-	-	-	-	gi|288558855|sp|P07814.5|SYEP_HUMAN	-
-	Nucleotide metabolism(2)
-	-	Purine metabolism	230	3	ko00230	K11787+K00873+K00948
-	-	-	-	-	-	-	gi|131616|sp|P22102.1|PUR2_HUMAN	-
-	-	-	-	-	-	-	gi|20178296|sp|P14618.4|KPYM_HUMAN	-
-	-	-	-	-	-	-	gi|24418495|sp|Q14558.2|KPRA_HUMAN	-
-	-	Pyrimidine metabolism	240	1	ko00240	K01937
-	-	-	-	-	-	-	gi|20981706|sp|P17812.2|PYRG1_HUMAN	-
Organismal Systems(8)
-	Circulatory system(2)
-	-	Cardiac muscle contraction	4260	3	ko04260	K05853+K01539+K09290+K10373
-	-	-	-	-	-	-	gi|114312|sp|P16615.1|AT2A2_HUMAN	-
-	-	-	-	-	-	-	gi|114374|sp|P05023.1|AT1A1_HUMAN	-
-	-	-	-	-	-	-	gi|519668659|sp|P06753.2|TPM3_HUMAN	-
-	-	Vascular smooth muscle contraction	4270	2	ko04270	K02677+K06269
-	-	-	-	-	-	-	gi|10719946|sp|O75131.1|CPNE3_HUMAN	-
-	-	-	-	-	-	-	gi|49065811|sp|P62136.1|PP1A_HUMAN	-
-	Development(2)
-	-	Axon guidance	4360	5	ko04360	K04630+K07860+K07528+K04348
-	-	-	-	-	-	-	gi|120996|sp|P08754.3|GNAI3_HUMAN	-
-	-	-	-	-	-	-	gi|121023|sp|P04899.3|GNAI2_HUMAN	-
-	-	-	-	-	-	-	gi|131806|sp|P15153.1|RAC2_HUMAN	-
-	-	-	-	-	-	-	gi|3122050|sp|Q14195.1|DPYL3_HUMAN	-
-	-	-	-	-	-	-	gi|60659599|sp|P16298.2|PP2BB_HUMAN	-
-	-	Osteoclast differentiation	4380	4	ko04380	K14380+K11219+K04348+K04467
-	-	-	-	-	-	-	gi|116241364|sp|Q14192.3|FHL2_HUMAN	-
-	-	-	-	-	-	-	gi|56405328|sp|P29597.3|TYK2_HUMAN	-
-	-	-	-	-	-	-	gi|60659599|sp|P16298.2|PP2BB_HUMAN	-
-	-	-	-	-	-	-	gi|67461558|sp|Q5RCJ9.2|ERLN1_PONAB	-
-	Digestive system(8)
-	-	Bile secretion	4976	1	ko04976	K01539
-	-	-	-	-	-	-	gi|114374|sp|P05023.1|AT1A1_HUMAN	-
-	-	Carbohydrate digestion and absorption	4973	3	ko04973	K02677+K01539+K00844
-	-	-	-	-	-	-	gi|10719946|sp|O75131.1|CPNE3_HUMAN	-
-	-	-	-	-	-	-	gi|114374|sp|P05023.1|AT1A1_HUMAN	-
-	-	-	-	-	-	-	gi|116242516|sp|P19367.3|HXK1_HUMAN	-
-	-	Fat digestion and absorption	4975	1	ko04975	K08745
-	-	-	-	-	-	-	gi|74749156|sp|Q6PCB7.1|S27A1_HUMAN	-
-	-	Gastric acid secretion	4971	4	ko04971	K02677+K01539+K04630
-	-	-	-	-	-	-	gi|10719946|sp|O75131.1|CPNE3_HUMAN	-
-	-	-	-	-	-	-	gi|114374|sp|P05023.1|AT1A1_HUMAN	-
-	-	-	-	-	-	-	gi|120996|sp|P08754.3|GNAI3_HUMAN	-
-	-	-	-	-	-	-	gi|121023|sp|P04899.3|GNAI2_HUMAN	-
-	-	Mineral absorption	4978	1	ko04978	K01539
-	-	-	-	-	-	-	gi|114374|sp|P05023.1|AT1A1_HUMAN	-
-	-	Pancreatic secretion	4972	4	ko04972	K02677+K05853+K01539+K07836
-	-	-	-	-	-	-	gi|10719946|sp|O75131.1|CPNE3_HUMAN	-
-	-	-	-	-	-	-	gi|114312|sp|P16615.1|AT2A2_HUMAN	-
-	-	-	-	-	-	-	gi|114374|sp|P05023.1|AT1A1_HUMAN	-
-	-	-	-	-	-	-	gi|47117723|sp|P61224.1|RAP1B_HUMAN	-
-	-	Protein digestion and absorption	4974	1	ko04974	K01539
-	-	-	-	-	-	-	gi|114374|sp|P05023.1|AT1A1_HUMAN	-
-	-	Salivary secretion	4970	3	ko04970	K02677+K01539+K13912
-	-	-	-	-	-	-	gi|10719946|sp|O75131.1|CPNE3_HUMAN	-
-	-	-	-	-	-	-	gi|114374|sp|P05023.1|AT1A1_HUMAN	-
-	-	-	-	-	-	-	gi|47115668|sp|Q08380.1|LG3BP_HUMAN	-
-	Endocrine system(6)
-	-	Adipocytokine signaling pathway	4920	1	ko04920	K04467
-	-	-	-	-	-	-	gi|67461558|sp|Q5RCJ9.2|ERLN1_PONAB	-
-	-	GnRH signaling pathway	4912	3	ko04912	K02677+K07763+K05704
-	-	-	-	-	-	-	gi|10719946|sp|O75131.1|CPNE3_HUMAN	-
-	-	-	-	-	-	-	gi|317373419|sp|P50281.3|MMP14_HUMAN	-
-	-	-	-	-	-	-	gi|74753102|sp|Q9P0V3.1|SH3B4_HUMAN	-
-	-	Insulin signaling pathway	4910	5	ko04910	K00844+K04438+K06269+K07207+K02991
-	-	-	-	-	-	-	gi|116242516|sp|P19367.3|HXK1_HUMAN	-
-	-	-	-	-	-	-	gi|1169094|sp|P46109.1|CRKL_HUMAN	-
-	-	-	-	-	-	-	gi|49065811|sp|P62136.1|PP1A_HUMAN	-
-	-	-	-	-	-	-	gi|51315850|sp|Q6GYQ0.1|RGPA1_HUMAN	-
-	-	-	-	-	-	-	gi|51338632|sp|P62753.1|RS6_HUMAN	-
-	-	Melanogenesis	4916	3	ko04916	K02677+K04630
-	-	-	-	-	-	-	gi|10719946|sp|O75131.1|CPNE3_HUMAN	-
-	-	-	-	-	-	-	gi|120996|sp|P08754.3|GNAI3_HUMAN	-
-	-	-	-	-	-	-	gi|121023|sp|P04899.3|GNAI2_HUMAN	-
-	-	PPAR signaling pathway	3320	1	ko03320	K08745
-	-	-	-	-	-	-	gi|74749156|sp|Q6PCB7.1|S27A1_HUMAN	-
-	-	Progesterone-mediated oocyte maturation	4914	4	ko04914	K04630+K04079+K02087
-	-	-	-	-	-	-	gi|120996|sp|P08754.3|GNAI3_HUMAN	-
-	-	-	-	-	-	-	gi|121023|sp|P04899.3|GNAI2_HUMAN	-
-	-	-	-	-	-	-	gi|17865718|sp|P08238.4|HS90B_HUMAN	-
-	-	-	-	-	-	-	gi|334302921|sp|P06493.3|CDK1_HUMAN	-
-	Excretory system(4)
-	-	Aldosterone-regulated sodium reabsorption	4960	2	ko04960	K02677+K01539
-	-	-	-	-	-	-	gi|10719946|sp|O75131.1|CPNE3_HUMAN	-
-	-	-	-	-	-	-	gi|114374|sp|P05023.1|AT1A1_HUMAN	-
-	-	Endocrine and other factor-regulated calcium reabsorption	4961	4	ko04961	K02677+K01539+K01528+K11826
-	-	-	-	-	-	-	gi|10719946|sp|O75131.1|CPNE3_HUMAN	-
-	-	-	-	-	-	-	gi|114374|sp|P05023.1|AT1A1_HUMAN	-
-	-	-	-	-	-	-	gi|125987821|sp|O00429.2|DNM1L_HUMAN	-
-	-	-	-	-	-	-	gi|34098614|sp|Q8WXE9.1|STON2_HUMAN	-
-	-	Proximal tubule bicarbonate reclamation	4964	1	ko04964	K01539
-	-	-	-	-	-	-	gi|114374|sp|P05023.1|AT1A1_HUMAN	-
-	-	Vasopressin-regulated water reabsorption	4962	1	ko04962	K12462
-	-	-	-	-	-	-	gi|317373567|sp|Q86Y56.4|HEAT2_HUMAN	-
-	Immune system(14)
-	-	Antigen processing and presentation	4612	9	ko04612	K03283+K04079+K09489+K08054
-	-	-	-	-	-	-	gi|123648|sp|P11142.1|HSP7C_HUMAN	-
-	-	-	-	-	-	-	gi|147744565|sp|P08107.5|HSP71_HUMAN	-
-	-	-	-	-	-	-	gi|1708307|sp|P54652.1|HSP72_HUMAN	-
-	-	-	-	-	-	-	gi|17865718|sp|P08238.4|HS90B_HUMAN	-
-	-	-	-	-	-	-	gi|206729934|sp|P34932.4|HSP74_HUMAN	-
-	-	-	-	-	-	-	gi|34978357|sp|P17066.2|HSP76_HUMAN	-
-	-	-	-	-	-	-	gi|50400671|sp|Q9N1U2.1|HSP76_SAGOE	-
-	-	-	-	-	-	-	gi|543920|sp|P27824.2|CALX_HUMAN	-
-	-	-	-	-	-	-	gi|75061973|sp|Q5RDM4.1|HSP74_PONAB	-
-	-	B cell receptor signaling pathway	4662	6	ko04662	K02677+K07860+K07369+K06856+K04348+K04467
-	-	-	-	-	-	-	gi|10719946|sp|O75131.1|CPNE3_HUMAN	-
-	-	-	-	-	-	-	gi|131806|sp|P15153.1|RAC2_HUMAN	-
-	-	-	-	-	-	-	gi|20455075|sp|Q9UDY8.1|MALT1_HUMAN	-
-	-	-	-	-	-	-	gi|218512079|sp|P01859.2|IGHG2_HUMAN	-
-	-	-	-	-	-	-	gi|60659599|sp|P16298.2|PP2BB_HUMAN	-
-	-	-	-	-	-	-	gi|67461558|sp|Q5RCJ9.2|ERLN1_PONAB	-
-	-	Chemokine signaling pathway	4062	8	ko04062	K02677+K04438+K04630+K07860+K07836+K04467+K05704
-	-	-	-	-	-	-	gi|10719946|sp|O75131.1|CPNE3_HUMAN	-
-	-	-	-	-	-	-	gi|1169094|sp|P46109.1|CRKL_HUMAN	-
-	-	-	-	-	-	-	gi|120996|sp|P08754.3|GNAI3_HUMAN	-
-	-	-	-	-	-	-	gi|121023|sp|P04899.3|GNAI2_HUMAN	-
-	-	-	-	-	-	-	gi|131806|sp|P15153.1|RAC2_HUMAN	-
-	-	-	-	-	-	-	gi|47117723|sp|P61224.1|RAP1B_HUMAN	-
-	-	-	-	-	-	-	gi|67461558|sp|Q5RCJ9.2|ERLN1_PONAB	-
-	-	-	-	-	-	-	gi|74753102|sp|Q9P0V3.1|SH3B4_HUMAN	-
-	-	Cytosolic DNA-sensing pathway	4623	1	ko04623	K04467
-	-	-	-	-	-	-	gi|67461558|sp|Q5RCJ9.2|ERLN1_PONAB	-
-	-	Fc epsilon RI signaling pathway	4664	3	ko04664	K02677+K07860+K06856
-	-	-	-	-	-	-	gi|10719946|sp|O75131.1|CPNE3_HUMAN	-
-	-	-	-	-	-	-	gi|131806|sp|P15153.1|RAC2_HUMAN	-
-	-	-	-	-	-	-	gi|218512079|sp|P01859.2|IGHG2_HUMAN	-
-	-	Fc gamma R-mediated phagocytosis	4666	5	ko04666	K02677+K04438+K01528+K07860+K06856
-	-	-	-	-	-	-	gi|10719946|sp|O75131.1|CPNE3_HUMAN	-
-	-	-	-	-	-	-	gi|1169094|sp|P46109.1|CRKL_HUMAN	-
-	-	-	-	-	-	-	gi|125987821|sp|O00429.2|DNM1L_HUMAN	-
-	-	-	-	-	-	-	gi|131806|sp|P15153.1|RAC2_HUMAN	-
-	-	-	-	-	-	-	gi|218512079|sp|P01859.2|IGHG2_HUMAN	-
-	-	Hematopoietic cell lineage	4640	1	ko04640	K06856
-	-	-	-	-	-	-	gi|218512079|sp|P01859.2|IGHG2_HUMAN	-
-	-	Intestinal immune network for IgA production	4672	1	ko04672	K06856
-	-	-	-	-	-	-	gi|218512079|sp|P01859.2|IGHG2_HUMAN	-
-	-	Leukocyte transendothelial migration	4670	5	ko04670	K02677+K04630+K07860+K07836
-	-	-	-	-	-	-	gi|10719946|sp|O75131.1|CPNE3_HUMAN	-
-	-	-	-	-	-	-	gi|120996|sp|P08754.3|GNAI3_HUMAN	-
-	-	-	-	-	-	-	gi|121023|sp|P04899.3|GNAI2_HUMAN	-
-	-	-	-	-	-	-	gi|131806|sp|P15153.1|RAC2_HUMAN	-
-	-	-	-	-	-	-	gi|47117723|sp|P61224.1|RAP1B_HUMAN	-
-	-	NOD-like receptor signaling pathway	4621	3	ko04621	K09487+K04079+K04467
-	-	-	-	-	-	-	gi|119360|sp|P14625.1|ENPL_HUMAN	-
-	-	-	-	-	-	-	gi|17865718|sp|P08238.4|HS90B_HUMAN	-
-	-	-	-	-	-	-	gi|67461558|sp|Q5RCJ9.2|ERLN1_PONAB	-
-	-	Natural killer cell mediated cytotoxicity	4650	4	ko04650	K02677+K07860+K06856+K04348
-	-	-	-	-	-	-	gi|10719946|sp|O75131.1|CPNE3_HUMAN	-
-	-	-	-	-	-	-	gi|131806|sp|P15153.1|RAC2_HUMAN	-
-	-	-	-	-	-	-	gi|218512079|sp|P01859.2|IGHG2_HUMAN	-
-	-	-	-	-	-	-	gi|60659599|sp|P16298.2|PP2BB_HUMAN	-
-	-	RIG-I-like receptor signaling pathway	4622	2	ko04622	K11594+K04467
-	-	-	-	-	-	-	gi|3023628|sp|O00571.3|DDX3X_HUMAN	-
-	-	-	-	-	-	-	gi|67461558|sp|Q5RCJ9.2|ERLN1_PONAB	-
-	-	T cell receptor signaling pathway	4660	3	ko04660	K07369+K04348+K04467
-	-	-	-	-	-	-	gi|20455075|sp|Q9UDY8.1|MALT1_HUMAN	-
-	-	-	-	-	-	-	gi|60659599|sp|P16298.2|PP2BB_HUMAN	-
-	-	-	-	-	-	-	gi|67461558|sp|Q5RCJ9.2|ERLN1_PONAB	-
-	-	Toll-like receptor signaling pathway	4620	1	ko04620	K04467
-	-	-	-	-	-	-	gi|67461558|sp|Q5RCJ9.2|ERLN1_PONAB	-
-	Nervous system(10)
-	-	Cholinergic synapse	4725	3	ko04725	K02677+K04630
-	-	-	-	-	-	-	gi|10719946|sp|O75131.1|CPNE3_HUMAN	-
-	-	-	-	-	-	-	gi|120996|sp|P08754.3|GNAI3_HUMAN	-
-	-	-	-	-	-	-	gi|121023|sp|P04899.3|GNAI2_HUMAN	-
-	-	Dopaminergic synapse	4728	5	ko04728	K02677+K04630+K06269+K04348
-	-	-	-	-	-	-	gi|10719946|sp|O75131.1|CPNE3_HUMAN	-
-	-	-	-	-	-	-	gi|120996|sp|P08754.3|GNAI3_HUMAN	-
-	-	-	-	-	-	-	gi|121023|sp|P04899.3|GNAI2_HUMAN	-
-	-	-	-	-	-	-	gi|49065811|sp|P62136.1|PP1A_HUMAN	-
-	-	-	-	-	-	-	gi|60659599|sp|P16298.2|PP2BB_HUMAN	-
-	-	GABAergic synapse	4727	4	ko04727	K02677+K04630+K05704
-	-	-	-	-	-	-	gi|10719946|sp|O75131.1|CPNE3_HUMAN	-
-	-	-	-	-	-	-	gi|120996|sp|P08754.3|GNAI3_HUMAN	-
-	-	-	-	-	-	-	gi|121023|sp|P04899.3|GNAI2_HUMAN	-
-	-	-	-	-	-	-	gi|74753102|sp|Q9P0V3.1|SH3B4_HUMAN	-
-	-	Glutamatergic synapse	4724	4	ko04724	K02677+K04630+K04348
-	-	-	-	-	-	-	gi|10719946|sp|O75131.1|CPNE3_HUMAN	-
-	-	-	-	-	-	-	gi|120996|sp|P08754.3|GNAI3_HUMAN	-
-	-	-	-	-	-	-	gi|121023|sp|P04899.3|GNAI2_HUMAN	-
-	-	-	-	-	-	-	gi|60659599|sp|P16298.2|PP2BB_HUMAN	-
-	-	Long-term depression	4730	3	ko04730	K02677+K04630
-	-	-	-	-	-	-	gi|10719946|sp|O75131.1|CPNE3_HUMAN	-
-	-	-	-	-	-	-	gi|120996|sp|P08754.3|GNAI3_HUMAN	-
-	-	-	-	-	-	-	gi|121023|sp|P04899.3|GNAI2_HUMAN	-
-	-	Long-term potentiation	4720	4	ko04720	K02677+K07836+K06269+K04348
-	-	-	-	-	-	-	gi|10719946|sp|O75131.1|CPNE3_HUMAN	-
-	-	-	-	-	-	-	gi|47117723|sp|P61224.1|RAP1B_HUMAN	-
-	-	-	-	-	-	-	gi|49065811|sp|P62136.1|PP1A_HUMAN	-
-	-	-	-	-	-	-	gi|60659599|sp|P16298.2|PP2BB_HUMAN	-
-	-	Neurotrophin signaling pathway	4722	6	ko04722	K06630+K04438+K12462+K07836
-	-	-	-	-	-	-	gi|112690|sp|P27348.1|1433T_HUMAN	-
-	-	-	-	-	-	-	gi|1169094|sp|P46109.1|CRKL_HUMAN	-
-	-	-	-	-	-	-	gi|317373567|sp|Q86Y56.4|HEAT2_HUMAN	-
-	-	-	-	-	-	-	gi|47117723|sp|P61224.1|RAP1B_HUMAN	-
-	-	-	-	-	-	-	gi|48428721|sp|P61981.2|1433G_HUMAN	-
-	-	-	-	-	-	-	gi|51702210|sp|P62258.1|1433E_HUMAN	-
-	-	Retrograde endocannabinoid signaling	4723	3	ko04723	K02677+K04630
-	-	-	-	-	-	-	gi|10719946|sp|O75131.1|CPNE3_HUMAN	-
-	-	-	-	-	-	-	gi|120996|sp|P08754.3|GNAI3_HUMAN	-
-	-	-	-	-	-	-	gi|121023|sp|P04899.3|GNAI2_HUMAN	-
-	-	Serotonergic synapse	4726	3	ko04726	K02677+K04630
-	-	-	-	-	-	-	gi|10719946|sp|O75131.1|CPNE3_HUMAN	-
-	-	-	-	-	-	-	gi|120996|sp|P08754.3|GNAI3_HUMAN	-
-	-	-	-	-	-	-	gi|121023|sp|P04899.3|GNAI2_HUMAN	-
-	-	Synaptic vesicle cycle	4721	2	ko04721	K01528+K11826
-	-	-	-	-	-	-	gi|125987821|sp|O00429.2|DNM1L_HUMAN	-
-	-	-	-	-	-	-	gi|34098614|sp|Q8WXE9.1|STON2_HUMAN	-
-	Sensory system(1)
-	-	Phototransduction - fly	4745	1	ko04745	K02677
-	-	-	-	-	-	-	gi|10719946|sp|O75131.1|CPNE3_HUMAN	-
